# Supplementary material for: Interaction of Aromatic Amino Acids with Metal Complexes of Tetrakis-(4-Sulfonatophenyl)Porphyrin
Source: MDPI journal article supplement (doi:10.3390/molecules29020472), 2024-01-18
Supplement: s1 [file s1]

# Interaction of Aromatic Aminoacids with Metal Complexes of Tetrakis-(4-sulfonatophenyl)porphyrin

Roberto Zagami,<sup>1</sup> Maria Angela Castriciano,<sup>1</sup> Mariachiara Trapani,<sup>2</sup> Andrea Romeo,<sup>1,2</sup> and Luigi Monsù Scolaro<sup>\*1,2</sup>

<sup>1</sup> Dipartimento di Scienze Chimiche, Biologiche, Farmaceutiche ed Ambientali, University of Messina, V.le F. Stagno D'Alcontres, 31 - 98166 Messina, Italy; rzagami@unime.it (R.Z.); maria.castriciano@unime.it (M.C.); anromeo@unime.it (A.R.); lmonsu@unime.it (L.M.S.)

<sup>2</sup> CNR - ISMN Istituto per lo Studio dei Materiali Nanostrutturati c/o Dipartimento di Scienze Chimiche, Biologiche, Farmaceutiche ed Ambientali, University of Messina, V.le F. Stagno D'Alcontres, 31 - 98166 Messina, Italy; mariachiara.trapani@cnr.it (M. T.)

## Table of contents

**Figure S1.** UV/Vis Titration of CuTPPS<sub>4</sub><sup>4-</sup> with L-Phe.

**Figure S2.** UV/Vis Titration of CuTPPS<sub>4</sub><sup>4-</sup> with D-Phe.

**Figure S3.** UV/Vis Titration of CuTPPS<sub>4</sub><sup>4-</sup> with L-His.

**Figure S4.** UV/Vis Titration of PtTPPS<sub>4</sub><sup>4-</sup> with L-Trp.

**Figure S5.** UV/Vis Titration of NiTPPS<sub>4</sub><sup>4-</sup> with L-Trp.

**Figure S6.** UV/Vis Titration of NiTPPS<sub>4</sub><sup>4-</sup> with L-Phe.

**Figure S7.** UV/Vis Titration of NiTPPS<sub>4</sub><sup>4-</sup> with D-Phe.

**Figure S8.** UV/Vis Titration of ZnTPPS<sub>4</sub><sup>4-</sup> with L-Trp.

**Figure S9.** UV/Vis Titration of H<sub>2</sub>TPPS<sub>4</sub><sup>4-</sup> with L-Trp.

**Figure S10.** UV/Vis Spectra of CoTPPS<sub>4</sub><sup>4-</sup> with L-Trp.

**Figure S11.** UV/Vis Spectra of CuTPPS<sub>4</sub><sup>4-</sup> with L-Ser.

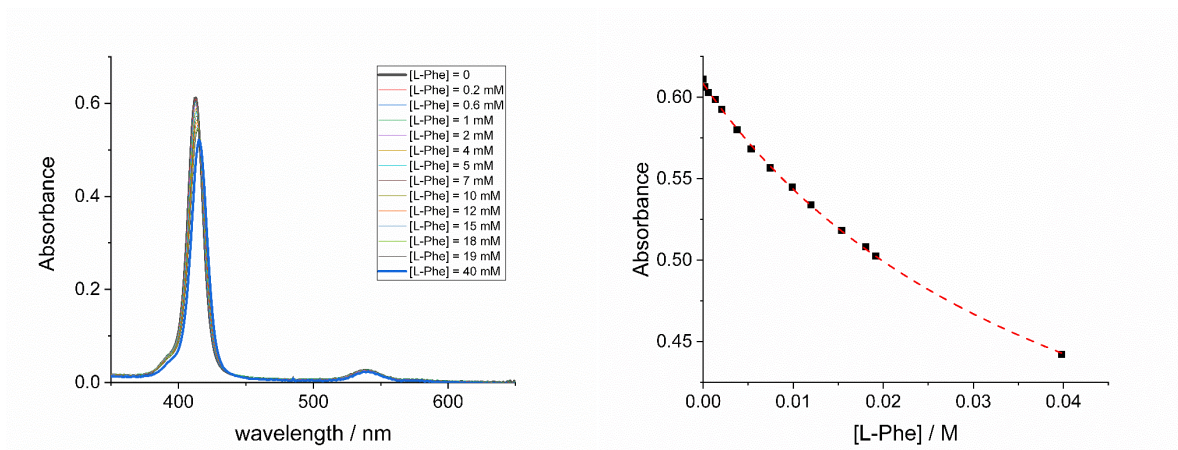

**Figure S1. (left)** UV/Vis absorption spectral changes for the progressive titration of CuTPPS<sub>4</sub><sup>4+</sup> (black line) with L-Phe up to a concentration of 40 mM (blue line). **(right)** Absorbance changes at the B-band of CuTPPS<sub>4</sub><sup>4+</sup> as function of the total concentration of added L-Phe. The red curve is the best fitting of the experimental data to eq. 6 (see Materials and methods). Experimental conditions: [CuTPPS<sub>4</sub><sup>4+</sup>] = 1.5  $\mu$ M; [L-Phe] = 0 – 40 mM; acetate buffer 100 mM, pH = 4; T = 298 K; cell path length 1 cm.

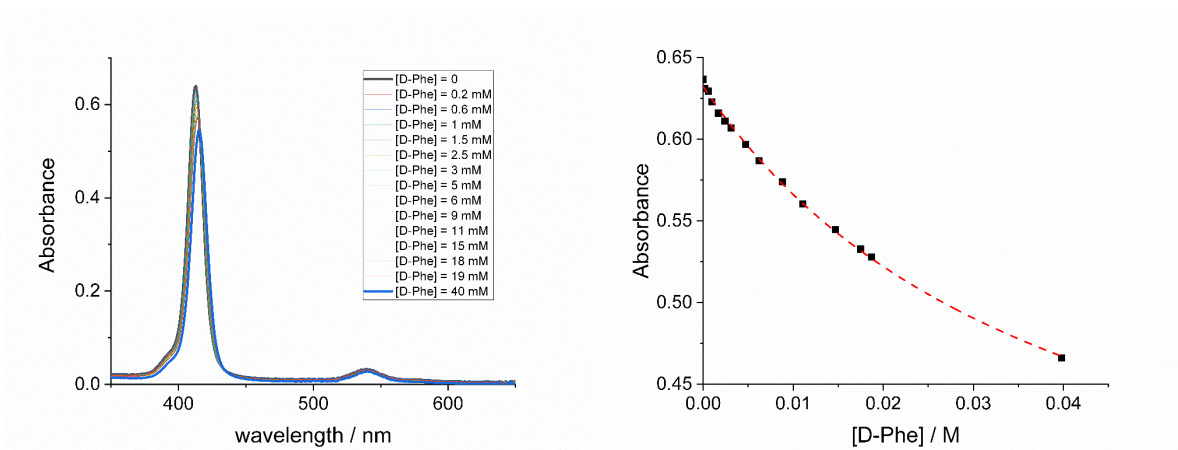

**Figure S2. (left)** UV/Vis absorption spectral changes for the progressive titration of CuTPPS<sub>4</sub><sup>4+</sup> (black line) with D-Phe up to a concentration of 40 mM (blue line). **(right)** Absorbance changes at the B-band of CuTPPS<sub>4</sub><sup>4+</sup> as function of the total concentration of added D-Phe. The red curve is the best fitting of the experimental data to eq. 6 (see Materials and methods). Experimental conditions: [CuTPPS<sub>4</sub><sup>4+</sup>] = 1.5  $\mu$ M; [D-Phe] = 0 – 40 mM; acetate buffer 100 mM, pH = 4; T = 298 K; cell path length 1 cm.

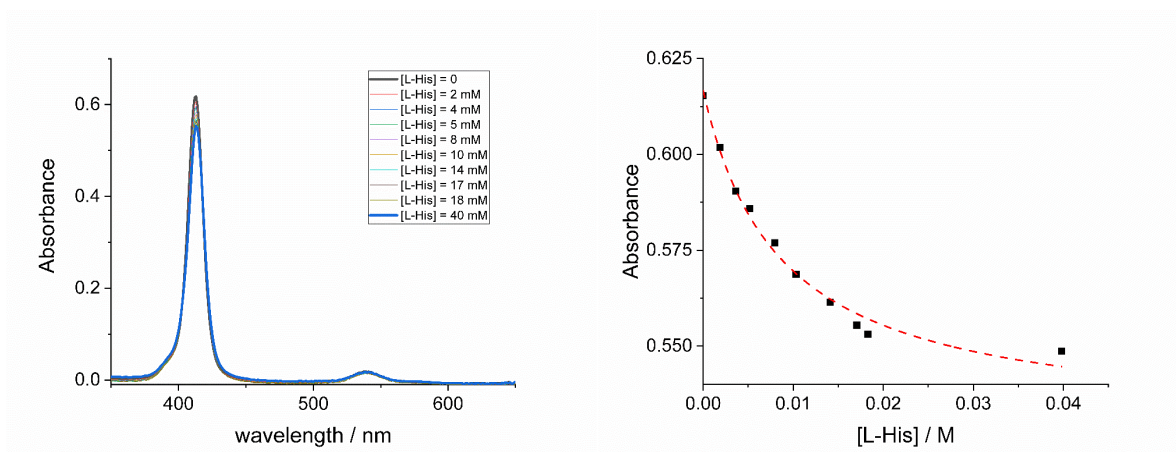

**Figure S3. (left)** UV/Vis absorption spectral changes for the progressive titration of  $\text{CuTPPS}_4^{4-}$  (black line) with L-His up to a concentration of 40 mM (blue line). **(right)** Absorbance changes at the B-band of  $\text{CuTPPS}_4^{4-}$  as function of the total concentration of added L-His. The red curve is the best fitting of the experimental data to eq. 6 (see Materials and methods). Experimental conditions:  $[\text{CuTPPS}_4^{4-}] = 1.5 \mu\text{M}$ ;  $[\text{L-His}] = 0 - 40 \text{ mM}$ ; acetate buffer 100 mM, pH = 4;  $T = 298 \text{ K}$ ; cell path length 1 cm.

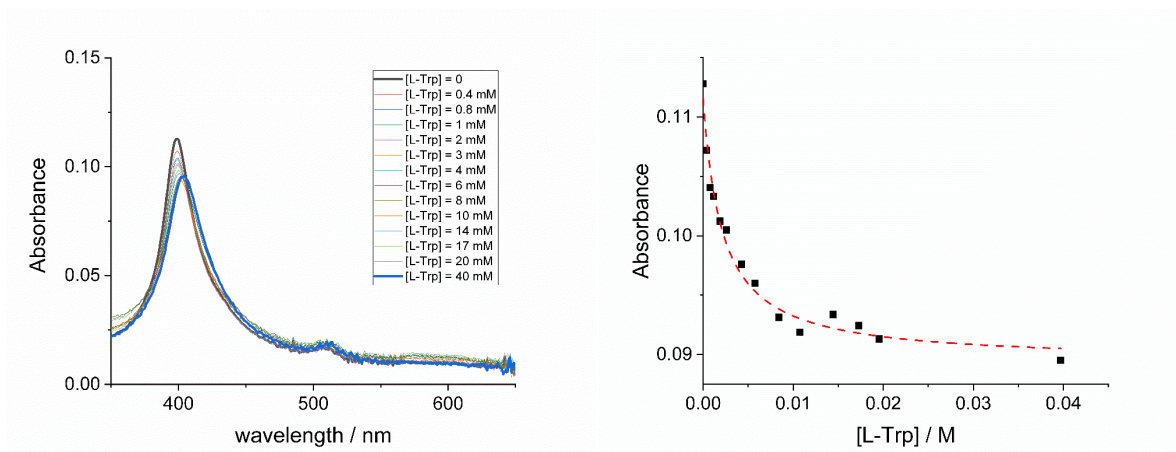

**Figure S4. (left)** UV/Vis absorption spectral changes for the progressive titration of  $\text{PtTPPS}_4^{4-}$  (black line) with L-Trp up to a concentration of 40 mM (blue line). **(right)** Absorbance changes at the B-band of  $\text{PtTPPS}_4^{4-}$  as function of the total concentration of added L-Trp. The red curve is the best fitting of the experimental data to eq. 6 (see Materials and methods). Experimental conditions:  $[\text{PtTPPS}_4^{4-}] = 1.5 \mu\text{M}$ ;  $[\text{L-Trp}] = 0 - 40 \text{ mM}$ ; acetate buffer 100 mM, pH = 4;  $T = 298 \text{ K}$ ; cell path length 1 cm.



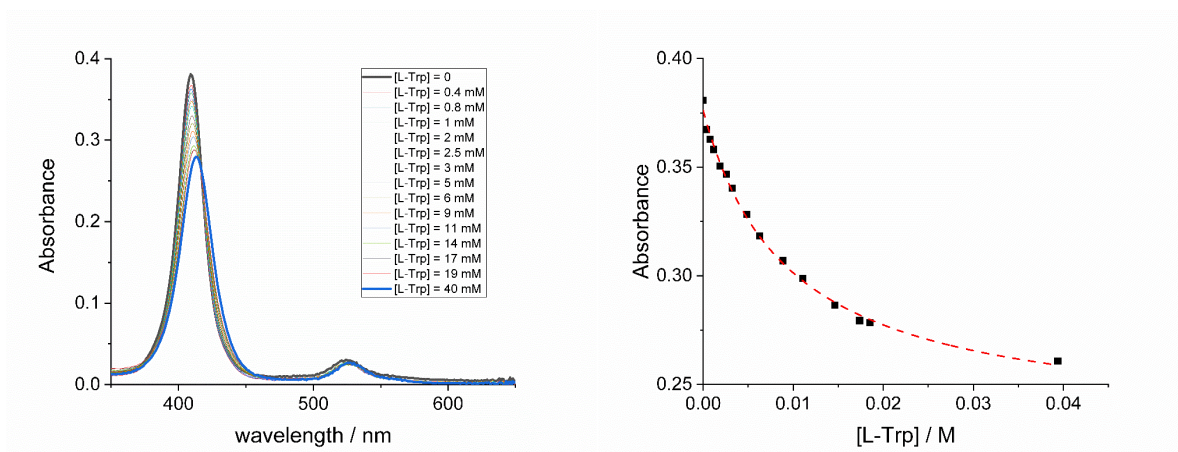

**Figure S5. (left)** UV/Vis absorption spectral changes for the progressive titration of NiTPPS<sub>4</sub><sup>4-</sup> (black line) with L-Trp up to a concentration of 40 mM (blue line). **(right)** Absorbance changes at the B-band of NiTPPS<sub>4</sub><sup>4-</sup> as function of the total concentration of added L-Trp. The red curve is the best fitting of the experimental data to eq. 6 (see Materials and methods). Experimental conditions: [NiTPPS<sub>4</sub><sup>4-</sup>] = 1.5  $\mu$ M; [L-Trp] = 0 – 40 mM; acetate buffer 100 mM, pH = 4; T = 298 K; cell path length 1 cm.

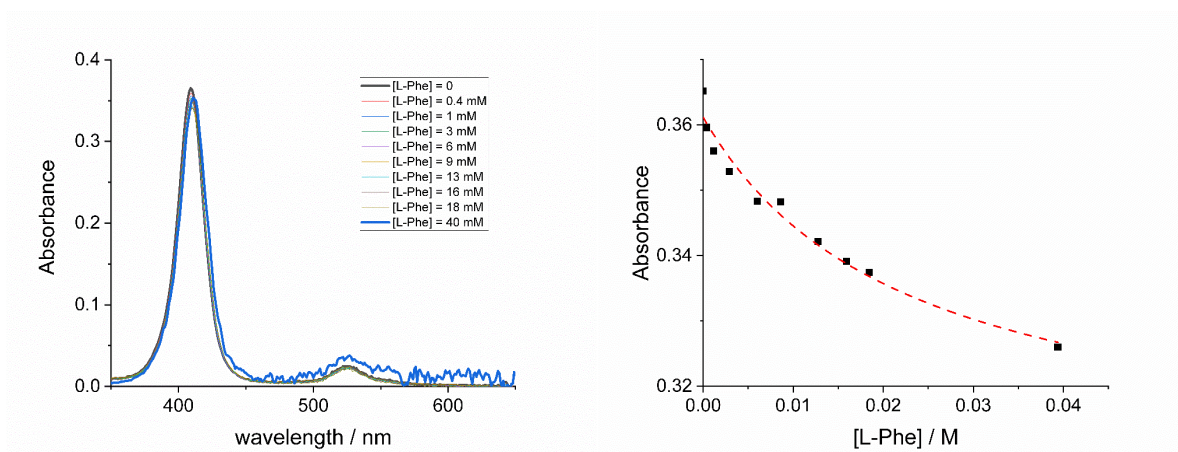

**Figure S6. (left)** UV/Vis absorption spectral changes for the progressive titration of NiTPPS<sub>4</sub><sup>4-</sup> (black line) with L-Phe up to a concentration of 40 mM (blue line). **(right)** Absorbance changes at the B-band of NiTPPS<sub>4</sub><sup>4-</sup> as function of the total concentration of added L-Phe. The red curve is the best fitting of the experimental data to eq. 6 (see Materials and methods). Experimental conditions: [NiTPPS<sub>4</sub><sup>4-</sup>] = 1.5  $\mu$ M; [L-Phe] = 0 – 40 mM; acetate buffer 100 mM, pH = 4; T = 298 K; cell path length 1 cm.

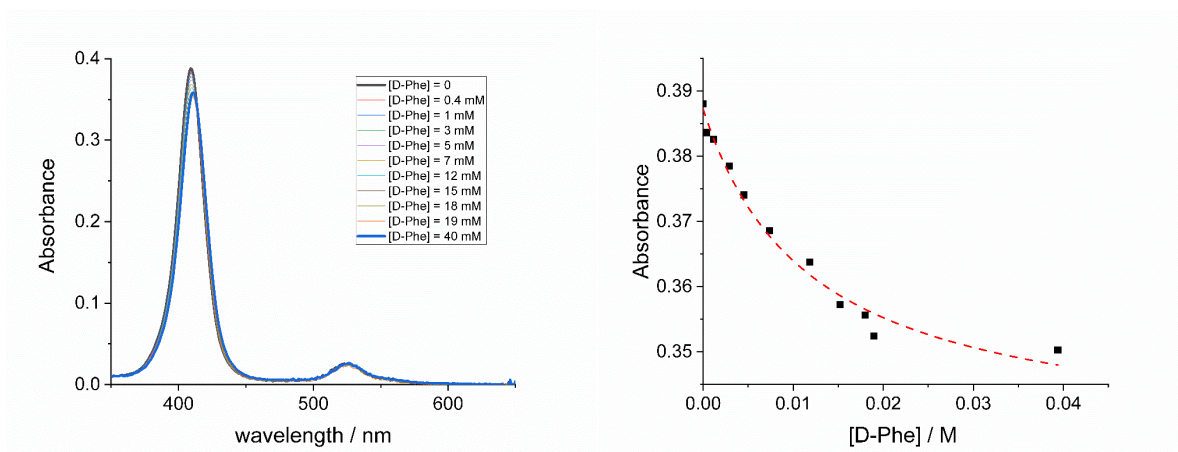

**Figure S7. (left)** UV/Vis absorption spectral changes for the progressive titration of NiTPPS<sub>4</sub><sup>4-</sup> (black line) with D-Phe up to a concentration of 40 mM (blue line). **(right)** Absorbance changes at the B-band of NiTPPS<sub>4</sub><sup>4-</sup> as function of the total concentration of added D-Phe. The red curve is the best fitting of the experimental data to eq. 6 (see Materials and methods). Experimental conditions: [NiTPPS<sub>4</sub><sup>4-</sup>] = 1.5  $\mu$ M; [D-Phe] = 0 – 40 mM; acetate buffer 100 mM, pH = 4; T = 298 K; cell path length 1 cm.

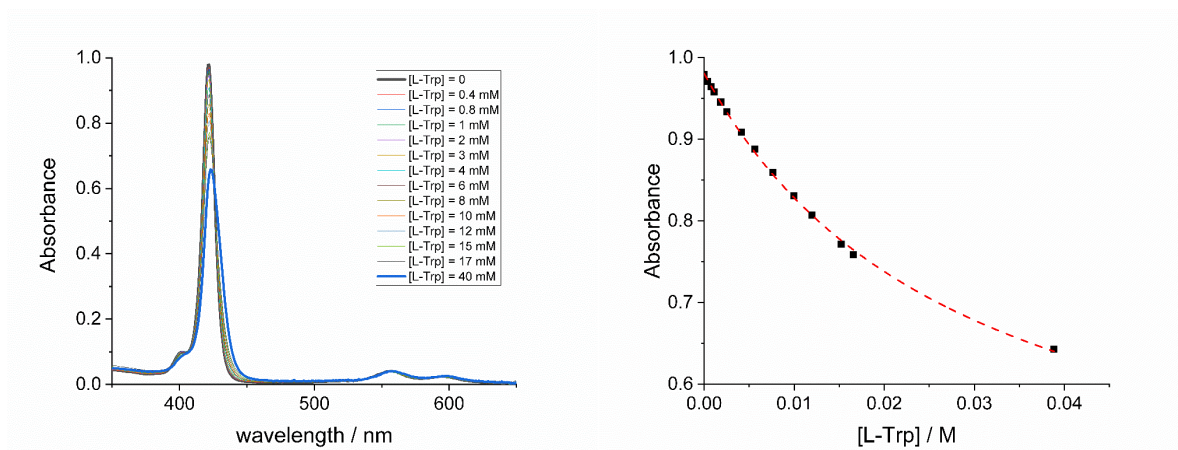

**Figure S8. (left)** UV/Vis absorption spectral changes for the progressive titration of ZnTPPS<sub>4</sub><sup>4-</sup> (black line) with L-Trp up to a concentration of 40 mM (blue line). **(right)** Absorbance changes at the B-band of ZnTPPS<sub>4</sub><sup>4-</sup> as function of the total concentration of added L-Trp. The red curve is the best fitting of the experimental data to eq. 6 (see Materials and methods). Experimental conditions: [ZnTPPS<sub>4</sub><sup>4-</sup>] = 1.5  $\mu$ M; [L-Trp] = 0 – 40 mM; acetate buffer 100 mM, pH = 4; T = 298 K; cell path length 1 cm.

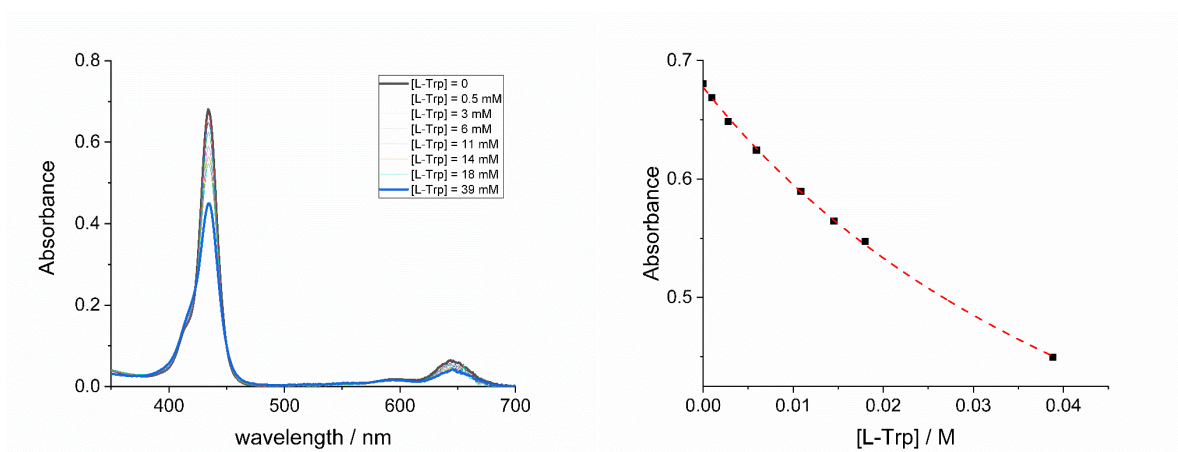

**Figure S9.** (left) UV/Vis absorption spectral changes for the progressive titration of  $\text{H}_2\text{TPPS}_4^{2-}$  (black line) with L-Trp up to a concentration of 40 mM (blue line). (right) Absorbance changes at the B-band of  $\text{H}_2\text{TPPS}_4^{2-}$  as function of the total concentration of added L-Trp. The red curve is the best fitting of the experimental data to eq. 6 (see Materials and methods). Experimental conditions:  $[\text{H}_2\text{TPPS}_4^{2-}] = 1.5 \mu\text{M}$ ;  $[\text{L-Trp}] = 0 - 39 \text{ mM}$ ; acetate buffer 100 mM, pH = 4;  $T = 298 \text{ K}$ ; cell path length 1 cm.

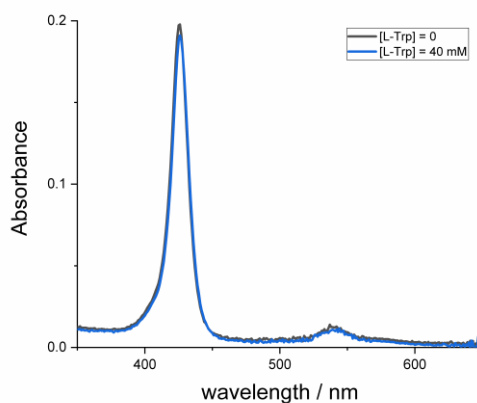

**Figure S10.** UV/Vis spectra of  $\text{CoTPPS}_4^{4-}$  (black line) and in presence of a concentration of 40 mM of L-Trp (blue line). Experimental conditions:  $[\text{CoTPPS}_4^{4-}] = 1.5 \mu\text{M}$ ;  $[\text{L-Trp}] = 40 \text{ mM}$ ; acetate buffer 100 mM, pH = 4;  $T = 298 \text{ K}$ ; cell path length 1 cm.

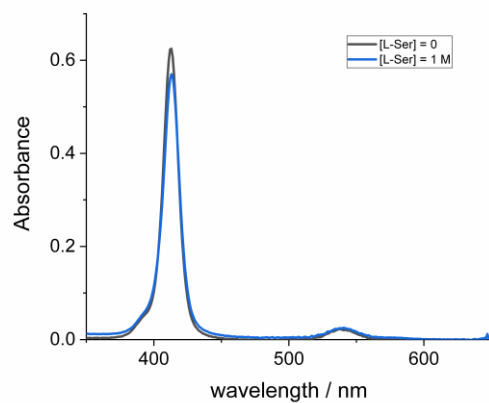

**Figure S11.** UV/Vis spectra of CuTPPS<sub>4</sub><sup>4-</sup> (black line) and in presence of a concentration of 1 M of L-Ser (blue line). Experimental conditions: [CuTPPS<sub>4</sub><sup>4-</sup>] = 1.5  $\mu$ M; [L-Ser] = 1 M; acetate buffer 100 mM, pH = 4; T = 298 K; cell path length 1 cm.
